# Supplementary material for: A new method for long-read sequencing of animal mitochondrial genomes: application to the identification of equine mitochondrial DNA variants
Source: PubMed Central journal article supplement (PMC7661214; doi:10.1186/s12864-020-07183-9), 2020-11-11

## Quantity of DNA after Repli-G

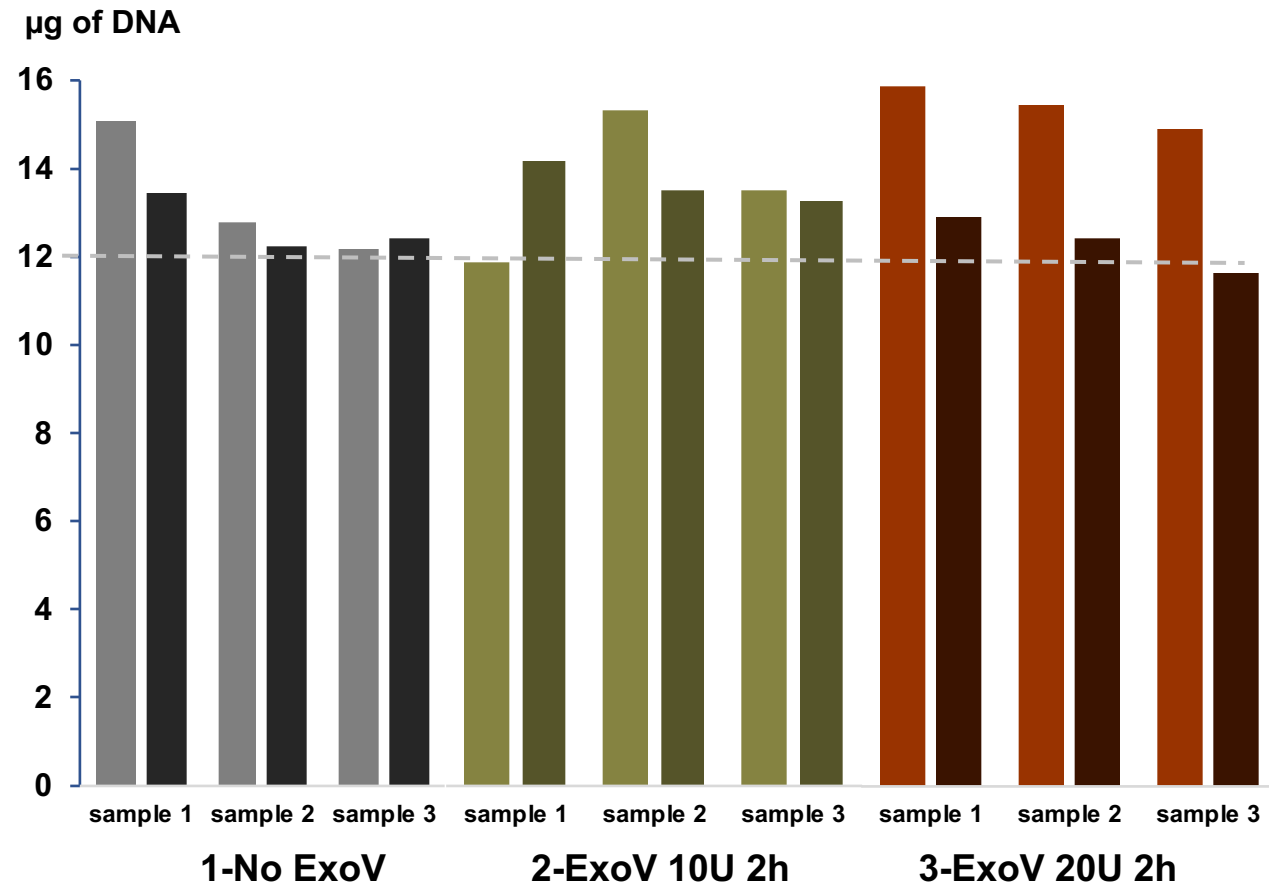

## Fragment size after Repli-G

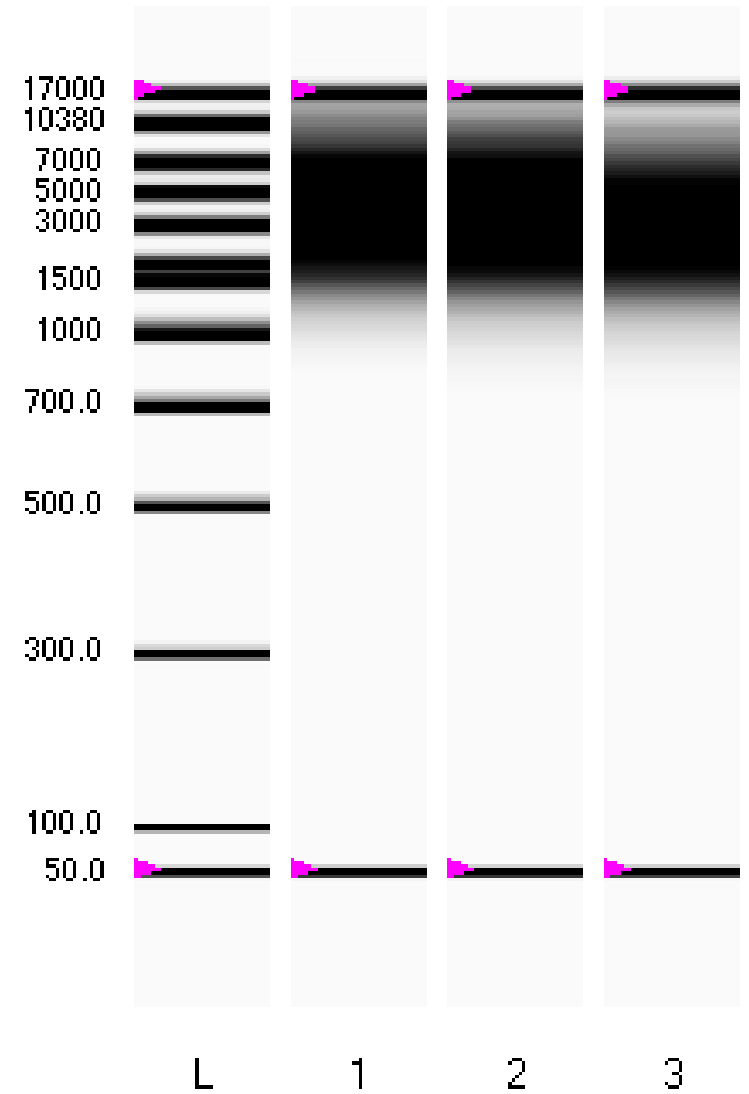

Supplement: 12864_2020_7183_MOESM4_ESM.pdf [file 12864_2020_7183_MOESM4_ESM.pdf]
