# Supplementary material for: A new method for long-read sequencing of animal mitochondrial genomes: application to the identification of equine mitochondrial DNA variants
Source: PubMed Central journal article supplement (PMC7661214; doi:10.1186/s12864-020-07183-9), 2020-11-11
Supplement: 12864_2020_7183_MOESM7_ESM.pdf [file 12864_2020_7183_MOESM7_ESM.pdf]

**25E1R1**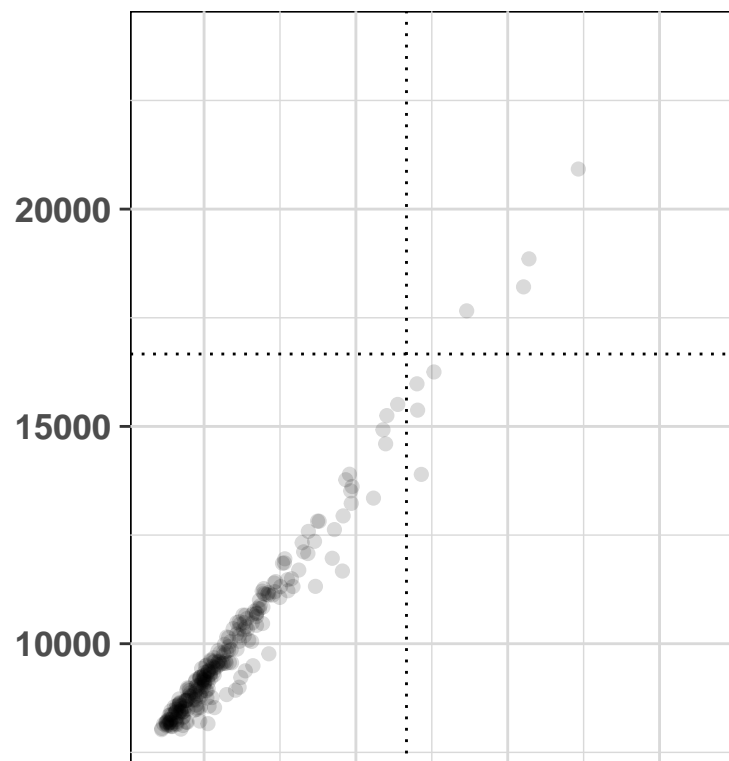**25E1R2**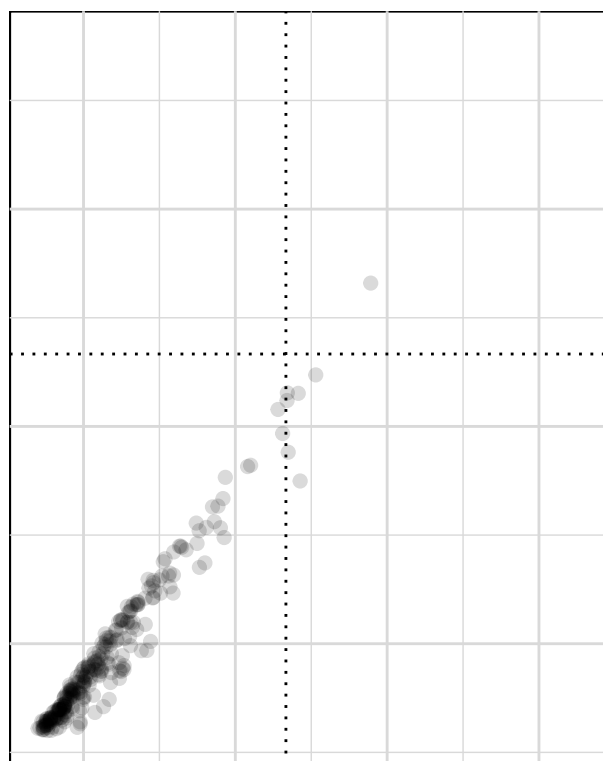**26E1R1**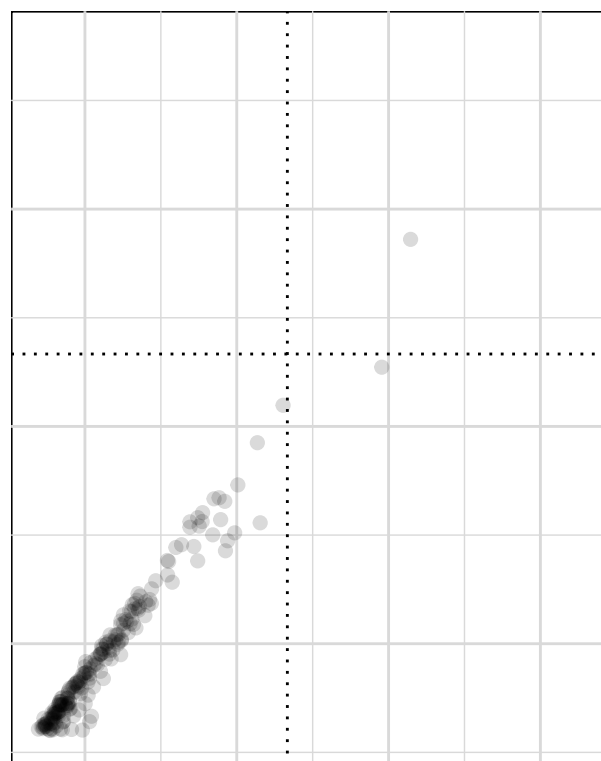**26E1R2**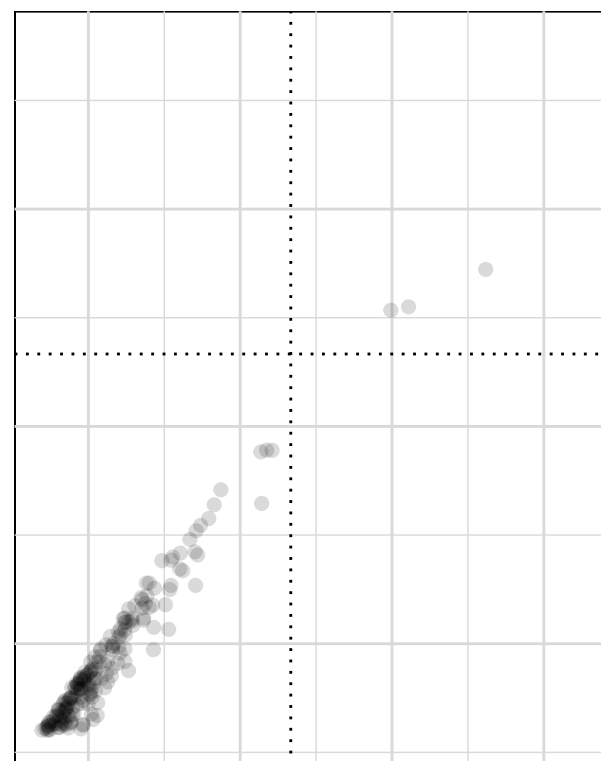**27E1R1**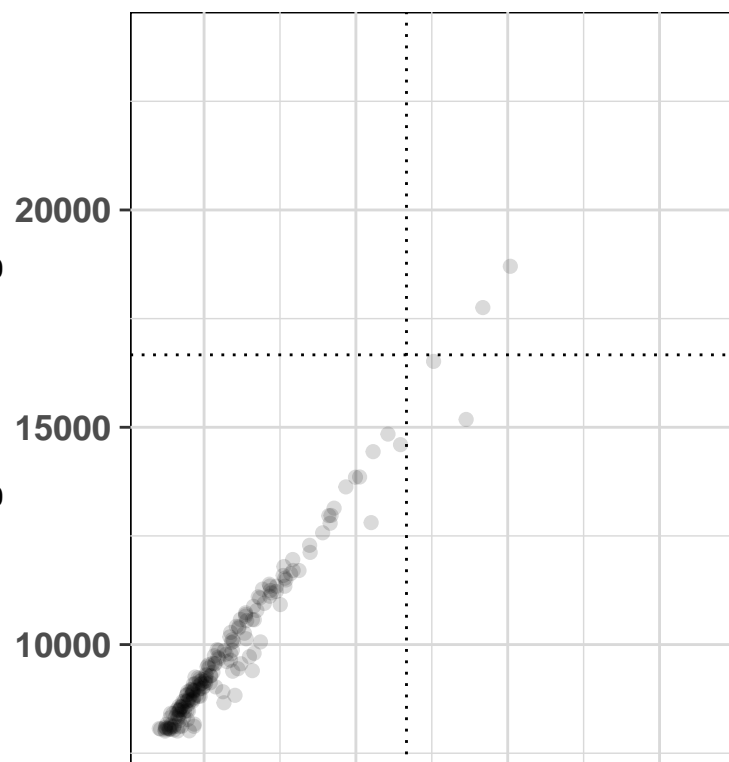**27E1R2**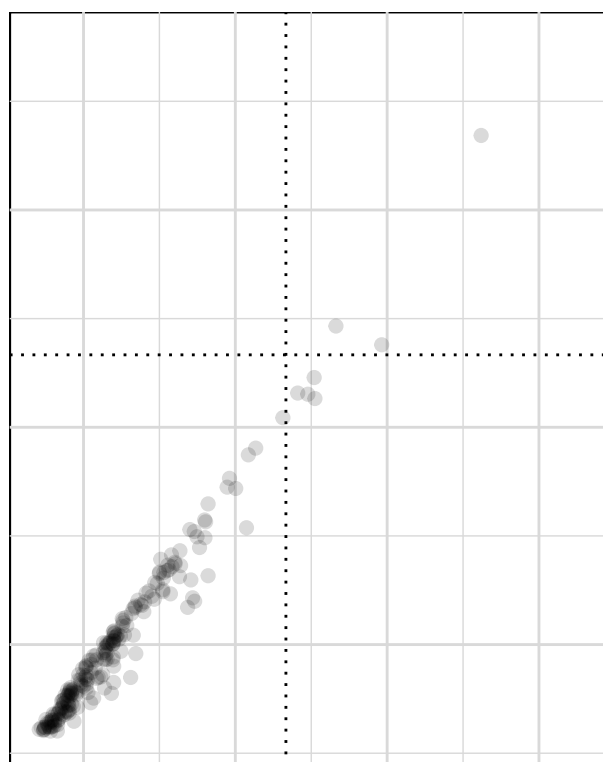**25E2R1**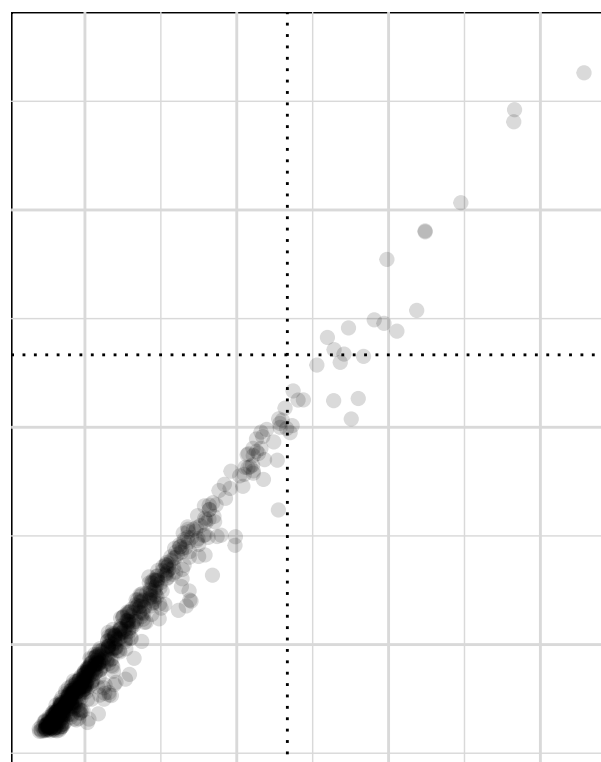**25E2R2**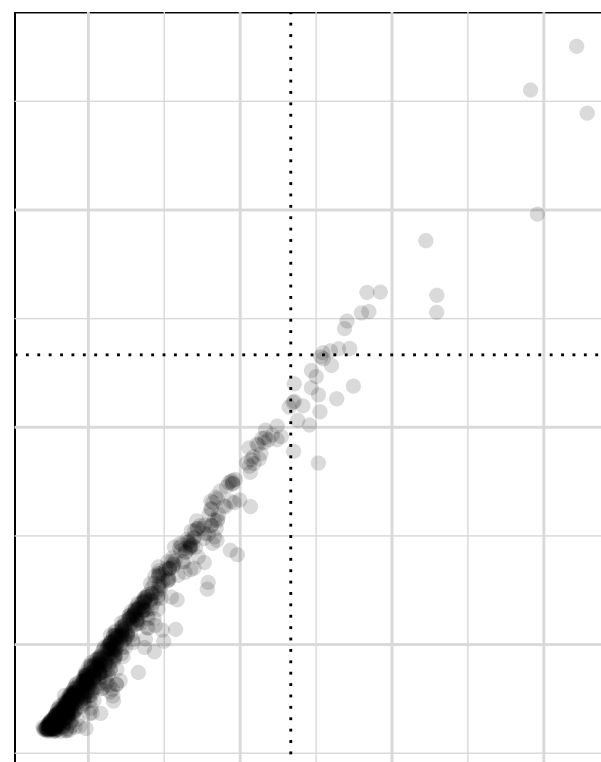**26E2R1**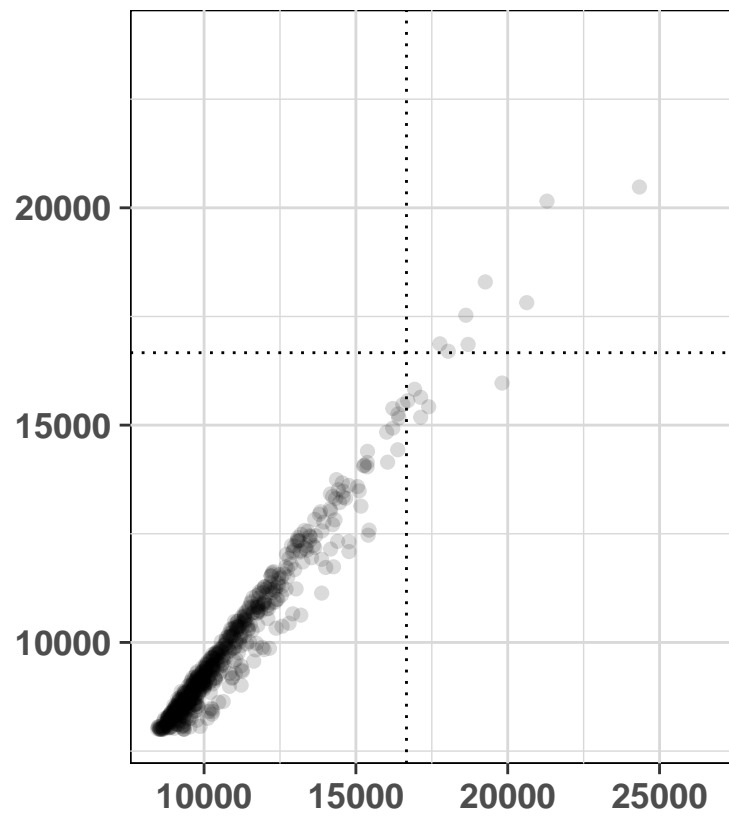**26E2R2**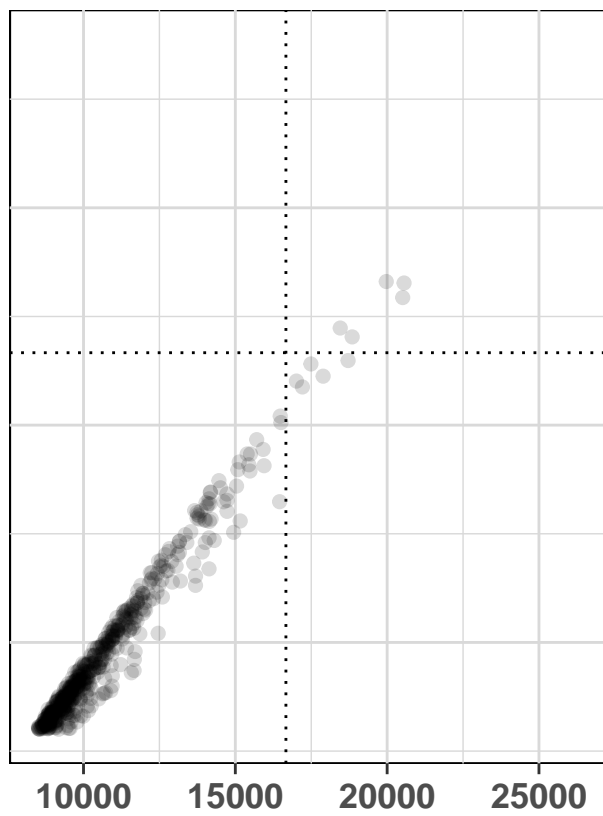**27E2R1**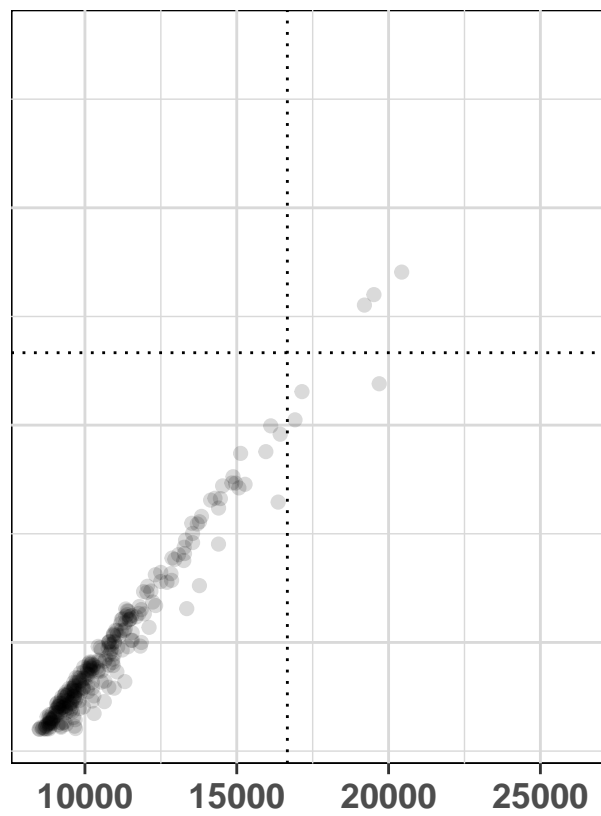**27E2R1**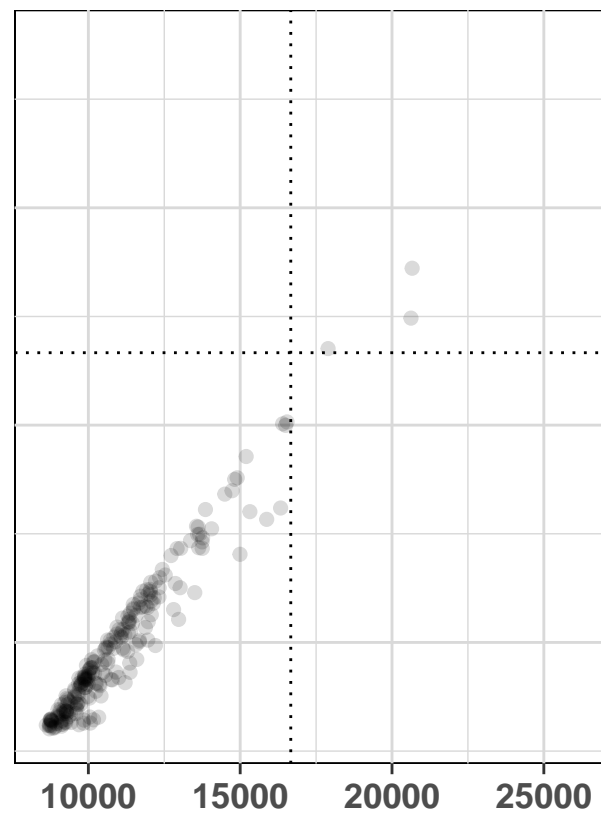**Read length****Alignment length**
